# Supplementary material
Source: PubMed Central journal article supplement (PMC7094527)
Supplement: mmc1.pdf [file mmc1.pdf]

## Online Supplement

### **Multiplex Molecular Detection of Respiratory Pathogens in Children with Asthma Exacerbation**

T. F. Leung<sup>1</sup>, M. Y. To<sup>1</sup>, A. C. M. Yeung<sup>2</sup>, Y. S. Wong<sup>1</sup>, G. W. K. Wong<sup>1</sup>, P. K. S. Chan<sup>2</sup>

Departments of <sup>1</sup>Pediatrics and <sup>2</sup>Microbiology, The Chinese University of Hong Kong, Prince of Wales Hospital, Shatin, Hong Kong

#### **Correspondence:**

T. F. Leung, MD, Department of Pediatrics, 6/F, Clinical Sciences Building, Prince of Wales Hospital, Shatin, N.T., Hong Kong.

Tel: (852) 2632 2981. Fax: (852) 2636 0020. E-mail: [tfleung@cuhk.edu.hk](mailto:tfleung@cuhk.edu.hk).

**Table 1a** Primers used in the first round of multiplex nested PCR

| Organism             | Primer name  | Sequence (5' to 3')*              | Product length (bp) |
|----------------------|--------------|-----------------------------------|---------------------|
| <i>Group 1</i>       |              |                                   |                     |
| Influenza A virus    | FluA-OF3     | TYGAGGCTCTCATGGARTGGCTAAAG        | 412                 |
|                      | FluA-OR3     | GCTGGCCARMACCATTCTGTTYTCAT        |                     |
| Influenza A virus H1 | H1-OF1       | CCCAGGRTATTTCKCCGAYTATGAGG        | 760                 |
|                      | H1-OR1       | TACCATTCCAGTCCACCCCCCTTCA         |                     |
| Influenza A virus H3 | H3-OF1       | ATGGGACCTTTTTRTYGAACGCAGCA        | 519                 |
|                      | H3-OR1       | CCCCKAGGAGCAATTAGATTCCTGT         |                     |
| Influenza A virus H5 | H5N1-VIET-1B | ATCAAACAGATTAGTCCTTGCG            | 265                 |
|                      | H5N1-VIET-2B | GGCCTCAAACCTGAGTGTTTCATT          |                     |
| Influenza B virus    | FluB-OF3     | AGGAAGRGCAATGGCAGAYAGAGG          | 883                 |
|                      | FluB-OR2     | TGCTGTGTCCCTCCCAAAGAAGAAA         |                     |
| <i>Group 2</i>       |              |                                   |                     |
| PIV-1                | PIV-1-OF1    | TCTGGATCCACCACAATTTTCAG           | 848                 |
|                      | PIV-1-OR1    | WACCAGTTGCAGTCTKGGTTTC            |                     |
| PIV-2                | PIV2-F1      | CTTGCAGCATTTTCTGGGGAACTCC         | 716                 |
|                      | PIV2-OR1     | GCATCATCATCCTGGGAGCCTCTGT         |                     |
| PIV-3                | PIV-3-OF1    | GATTTTGGAGATGCACGTCTG             | 1118                |
|                      | PIV-3-OR1    | GAGAGTGTTYTGTTTCGGATGG            |                     |
| PIV-4                | PIV-4AB-IF1  | AYGGATGCATTCTGAATTCATCATTC        | 432                 |
|                      | PIV-4AB-OR1  | TCCRTRAGRCCYCCATAACAARGG          |                     |
| <i>Group 3</i>       |              |                                   |                     |
| RSV A                | RSV-A-OF2    | CAGCTCCGTTATCACATCTCTAGGAGCC      | 576                 |
|                      | RSV-A-OR2    | TGGGTTGTCTATGAGCAGATAKKAAC<br>CA  |                     |
| RSV B                | RSV-B-OF2    | CGGGCCAGAAGAGAAGCACCACAGTA        | 673                 |
|                      | RSV-B-OR2    | TGATCCTTCTTTGATGTTGGTGGTGC        |                     |
| HRV                  | OL26-MOD-RV  | CACTTCTGTTTCCCCGGAGCGAG           | 388                 |
|                      | RV-OR2       | GAAACACGGACACCCAAAGTAGTCGGT       |                     |
| EV **                | EV-OF3       | CTGCGYTGCGGCCYMCC                 | 481                 |
|                      | EV-OR2       | CCGGATGGCCAATCCAATAACTATATGG<br>T |                     |
| <i>Group 4</i>       |              |                                   |                     |
| HCoV-OC43            | HCoVOC43-OF3 | CGGTTACTGTTCAGCCAATYGCA           | 793                 |

|                      |                  |                              |     |
|----------------------|------------------|------------------------------|-----|
|                      | HCoVOC43-OR3     | CCAACCCAAAAATGCTTGTGGTYG     |     |
| SARS-CoV             | COR1             | CACCGTTTCTACAGGTTAGCTAACGA   | 310 |
|                      | COR2             | AAATGTTTACGCAGGTAAGCGTAAAA   |     |
| HCoV-229E            | COR229E-IF2      | TCACCCATTTGAAGAATTGGAATTTTGG | 566 |
|                      | COR229E-IR2      | TCGTACGTAGAAAACCCAGCCTGTGC   |     |
| HMPV                 | Meta-M-OF2       | CAATATGGTTCCTTTGTTTCAGGCCA   | 462 |
|                      | Meta-M-OR2       | TGGTCTGCTTCACTGCTTATWGCAGCTT |     |
| <i>Group 5</i>       |                  |                              |     |
| <i>M. pneumoniae</i> | Mpneumoniae-OF2  | GACCATTCCACCCAGCCCCAGC       | 343 |
|                      | Mpneumoniae-OR2  | G TTCAGCGAGTGGGGTGCGTACAATA  |     |
| <i>C. pneumoniae</i> | Chlamy-pneum-OF4 | TGCGCTACTTGGTGCGACGCTA       | 571 |
|                      | Chlamy-pneum-OR4 | CGCCTTTATAGCCCTTGGGTTTRTTT   |     |
| HBoV                 | BocaVP-OF2       | GGGACGCACCACAAAACACCT        | 422 |
|                      | BocaVP-OR2       | GCCAGCTGTGAGGTCATTGTTGT      |     |
| Adenovirus 1, 2 & 3  | ADVAtoF-OF3      | TACATGCACATCKCSGGVCAGGA      | 983 |
|                      | ADVAtoF-OR3      | CCRGCCARHACHCCCATRRTDCCHGT   |     |

EV: enterovirus; HBoV: human bocavirus; HCoV: human coronavirus; HMPV: human metapneumovirus; HRV: human rhinovirus; PIV: parainfluenza; RSV: respiratory syncytial virus.

\* Degenerate primer abbreviations are as follows: M, A/C; R, A/G; W, A/T; S, C/G; Y, C/T; K, G/T; V, A/C/G; H, A/C/T; D, A/G/T; N, A/C/G/T.

\*\* Included coxsackie A9, B1, B2, B3 and B5; Echo 7, 11 and 30; EV71; and polio 1.

**Table 1b** Primers used in the second round of multiplex nested PCR

| Organism             | Primer name   | Sequence (5' to 3')*             | Product length (bp) |
|----------------------|---------------|----------------------------------|---------------------|
| <i>Group 1</i>       |               |                                  |                     |
| Influenza A virus    | FluARe-F1     | AAGACCAATCCTGTCACCTCTGA          | 104                 |
|                      | FluARe-R1     | CAAAGCGTCTACGCTGCAGTCC           |                     |
| Influenza A virus H1 | H1-IF2        | TCGCCGACTATGAGGAACTGAGGGA        | 431                 |
|                      | H1-IR2        | TTGTATCCCCGGTTCCAGCAGAGT         |                     |
| Influenza A virus H3 | H3-IF2        | CCCTTATGATGTGCCGATTATGCC         | 259                 |
|                      | H3-IR2        | GGTGGTGAACCCCCCAAATGTACAA        |                     |
| Influenza A virus H5 | H5N1-VIET-1A  | TGCGACTGGRCTCAGAAATA             | 172                 |
|                      | H5N1-VIET-4B  | GGATTCTTTGTCTGCAGCGT             |                     |
| Influenza B virus    | FLUB-IF3      | AAAACAARTGCTCTGCRCCYCAAC         | 516                 |
|                      | FLUB-IR3      | CRTCTCCACCTACTTCRTTYCCCCC        |                     |
| <i>Group 2</i>       |               |                                  |                     |
| PIV-1                | PIV-1-IF1     | AATTGGTGATGCAATATATGCKTATTC      | 600                 |
|                      | PIV-1-IR1     | TCGACAACAATYTTTGGCCTATC          |                     |
| PIV-2                | PIV2-F2       | AGGACAGCAGAGGACCTCGGCATG         | 343                 |
|                      | PIV2-R2       | ACCTGATGTTCTTTGCGGTATGGGG        |                     |
| PIV-3                | PIV-3-IF1     | CAACTGTGTTCTRACTCCCAAAG          | 717                 |
|                      | PIV-3-IR1     | TGGGTTYACTCTCGATTTTTGY           |                     |
| PIV-4                | PIV-4AB-IF2   | GACGGATGYTRCKGWATTGTGT           | 231                 |
|                      | PIV-4AB-IR2   | CCRTRAGRCCYCCATACAARGGAA         |                     |
| <i>Group 3</i>       |               |                                  |                     |
| RSV A                | RSVA-IF2      | TGACCCATTAGTGTCCCCTCTGATGAA<br>T | 228                 |
|                      | RSVA-IR2      | CTTCTGGCCTTRCAGTATARGAGCAGT      |                     |
| RSV B                | RSV-B-IF1     | GTCGCATCTCAACATTGRAAC            | 336                 |
|                      | RSV-B-IR1     | TGGTGCATAGAGGTGATGTGTG           |                     |
| HRV                  | RV-OF2        | CACTTCTGTTTCCCCGGAGCGAGG         | 283                 |
|                      | JWA-1B-MOD-RV | CCGCATTCAGGGGCCGGAG              |                     |
| EV                   | EV-IF3        | CCTCCGGCCCCCTGAATGCG             | 106                 |
|                      | EV-IR3        | CCAAAGTAGTCGGTTCCGCYRCRGA        |                     |
| <i>Group 4</i>       |               |                                  |                     |
| HCoV-OC43            | HCoVOC43-IF2  | CKGTGCCCTCTCCATTAATTGGG          | 635                 |
|                      | HCoVOC43-IR2  | GACCCGAACAGTGCTCACCTATGCC        |                     |

|                      |                  |                                   |     |
|----------------------|------------------|-----------------------------------|-----|
| SARS-CoV             | COR3             | AGTGAGATGGTCATGTGTGG              | 210 |
|                      | COR4             | CACTCATAGAGCCTGTGTTG              |     |
| HCoV-229E            | COR229E-IF3      | TTGGGATTCTAATTGGGCCTTTGTTGC       | 361 |
|                      | COR229E-IR3      | GCTCGGCACGGCAACTGTCATGTAT         |     |
| HMPV                 | Meta-M-IF2       | CCCTTTGTTTCAGGCCAAYACACCACC       | 431 |
|                      | Meta-M-IR2       | GCAGCTTCAACAGTRGCTGATTCACTC<br>TC |     |
| <i>Group 5</i>       |                  |                                   |     |
| <i>M. pneumoniae</i> | Mpneumoniae-OF1  | AGGGGGTTCTTCAGGCTCAGGTCAA         | 160 |
|                      | Mpneumoniae-OR1  | CCCCACACATCATTCCCCGTATTA          |     |
| <i>C. pneumoniae</i> | Chlamy-pneum-IF6 | RCCTACWGGATCCGCTRCTGCRAA          | 317 |
|                      | Chlamy-pneum-IR6 | GCRCTACGCTCCAAGMRAAAGWRG          |     |
| HBoV                 | BocaVP-IF4       | TGGGGATTTCCACTGGAGGG              | 176 |
|                      | BocaVP-IR3       | CCATGGAGTTGTGACGCAGCG             |     |
| Adenovirus 1, 2 & 3  | ADVAtoF-IF3      | TGGCYWSCACNTWCTTTGACATYMG         | 463 |
|                      | ADVAtoF-IR3      | GCRWAWGAHCCRTARCAKGGYTDCAT        |     |

EV: enterovirus; HBoV: human bocavirus; HCoV: human coronavirus; HMPV: human metapneumovirus; HRV: human rhinovirus; PIV: parainfluenza; RSV: respiratory syncytial virus.

\* Degenerate primer abbreviations are as follows: M, A/C; R, A/G; W, A/T; S, C/G; Y, C/T; K, G/T; V, A/C/G; H, A/C/T; D, A/G/T; N, A/C/G/T.

**Table 1c** Thermal cycling parameters for multiplex nested PCRCycling conditions for Group 1 (1<sup>st</sup> and 2<sup>nd</sup> round)

|      |        |   |           |
|------|--------|---|-----------|
| 94°C | 5 min  |   |           |
| 94°C | 36 sec | } | 40 cycles |
| 64°C | 36 sec |   |           |
| 72°C | 1 min  |   |           |
| 72°C | 10 min |   |           |
| 15°C | 20 min |   |           |

Cycling conditions for Group 2 (1<sup>st</sup> and 2<sup>nd</sup> round)

|      |        |   |           |
|------|--------|---|-----------|
| 94°C | 5 min  |   |           |
| 94°C | 36 sec | } | 40 cycles |
| 55°C | 36 sec |   |           |
| 72°C | 1 min  |   |           |
| 72°C | 10 min |   |           |
| 15°C | 20 min |   |           |

Cycling conditions for Group 3 (1<sup>st</sup> and 2<sup>nd</sup> round)

|      |        |   |           |
|------|--------|---|-----------|
| 94°C | 5 min  |   |           |
| 94°C | 30 sec | } | 35 cycles |
| 64°C | 30 sec |   |           |
| 72°C | 30 sec |   |           |
| 72°C | 10 min |   |           |
| 15°C | 20 min |   |           |

Cycling conditions for Group 4 (1<sup>st</sup> and 2<sup>nd</sup> round)

|      |        |   |           |
|------|--------|---|-----------|
| 94°C | 5 min  |   |           |
| 94°C | 36 sec | } | 40 cycles |
| 64°C | 36 sec |   |           |
| 72°C | 1 min  |   |           |
| 72°C | 10 min |   |           |
| 15°C | 20 min |   |           |

Cycling conditions for Group 5 (1<sup>st</sup> round)

|      |        |   |           |
|------|--------|---|-----------|
| 94°C | 5 min  |   |           |
| 94°C | 40 sec | } | 40 cycles |
| 62°C | 40 sec |   |           |
| 72°C | 1 min  |   |           |
| 72°C | 10 min |   |           |
| 15°C | 20 min |   |           |

Cycling conditions for Group 5 (2<sup>nd</sup> round)

|      |        |   |           |
|------|--------|---|-----------|
| 94°C | 5 min  |   |           |
| 94°C | 40 sec | } | 40 cycles |
| 58°C | 40 sec |   |           |
| 72°C | 1 min  |   |           |
| 72°C | 10 min |   |           |
| 15°C | 20 min |   |           |

Electrophorese the PCR products on 1.5 % agarose for 1 hour at 120V, with 11 cm x 14 cm gel size and visualize PCR products using SYBR Safe pre-staining.
